# Supplementary material
Source: PubMed Central journal article supplement (PMC3225746)
Supplement: epi0609_1105SD1.pdf [file epi0609_1105SD1.pdf]

**Supplementary Table 1. Validation of candidate metastable epialleles.** Site-specific ranges and variances of percent methylation at three candidate loci, *Dnajb1*, *Glc1l* Repeat 1, and *Glc1l* Repeat 2 are characteristic of the Agouti Expression Fingerprint.

| Locus                 | Tissue | Site | Minimum Methylation | Maximum Methylation | Mean Methylation±SEM | Variance |
|-----------------------|--------|------|---------------------|---------------------|----------------------|----------|
| Dnajb1 (N=11)         | Liver  | 1    | 0                   | 5.21                | 2.88±0.38            | 2.22     |
|                       |        | 2    | 0                   | 18.95               | 12.06±1.23           | 22.67    |
|                       |        | 3    | 0                   | 2.59                | 0.84±0.28            | 1.39     |
|                       | Kidney | 1    | 0                   | 2.57                | 1.29±0.28            | 1.01     |
|                       |        | 2    | 0                   | 13.11               | 5.95±0.82            | 8.82     |
|                       |        | 3    | 0                   | 4.71                | 3.53±0.32            | 1.37     |
|                       | Brain  | 1    | 1.03                | 3.70                | 3.00±0.23            | 0.56     |
|                       |        | 2    | 3.02                | 6.46                | 5.31±0.31            | 1.03     |
|                       |        | 3    | 0                   | 3.80                | 1.20±0.29            | 0.96     |
| Glc1l Repeat 1 (N=10) | Liver  | 1    | 91.74               | 96.2                | 93.58±0.46           | 2.15     |
|                       |        | 2    | 93.72               | 97.84               | 95.31±0.46           | 2.12     |
|                       |        | 3    | 99.29               | 100                 | 99.93±0.07           | 0.05     |
|                       | Kidney | 1    | 87.11               | 100                 | 93.89±1.08           | 11.67    |
|                       |        | 2    | 91.19               | 96.89               | 95.11±0.54           | 2.95     |
|                       |        | 3    | 100                 | 100                 | 100.00±0.00          | 0        |
|                       | Brain  | 1    | 88.74               | 95.34               | 93.27±0.56           | 3.15     |
|                       |        | 2    | 92.92               | 96                  | 94.67±0.36           | 1.30     |
|                       |        | 3    | 99.59               | 100                 | 99.96±0.04           | 0.02     |
| Glc1l Repeat 2 (N=9)  | Liver  | 1    | 93.65               | 100                 | 98.55±0.74           | 4.97     |
|                       |        | 2    | 94.52               | 100                 | 98.37±0.74           | 4.87     |
|                       |        | 3    | 100                 | 100                 | 100.00±0.00          | 0        |
|                       |        | 4    | 78.56               | 88.44               | 83.10±1.10           | 10.92    |
|                       | Kidney | 1    | 89.51               | 100                 | 98.19±1.18           | 12.47    |
|                       |        | 2    | 95.26               | 100                 | 98.60±0.58           | 2.99     |
|                       |        | 3    | 99.04               | 100                 | 99.89±0.11           | 0.10     |
|                       |        | 4    | 75.94               | 85.46               | 81.37±1.05           | 9.92     |
|                       | Brain  | 1    | 98.63               | 100                 | 99.81±0.46           | 0.21     |
|                       |        | 2    | 92.93               | 100                 | 97.33±1.00           | 8.94     |
|                       |        | 3    | 100                 | 100                 | 100.00±0.00          | 0        |
|                       |        | 4    | 70.04               | 82.11               | 76.93±1.49           | 17.65    |

**Supplementary Table 2.** Primers and sequences-to-analyze for pyrosequencing assays of three candidate loci *Dnajb1*, *Glcc1l* Repeat 1, and *Glcc1l* Repeat 2, as well as primers for quantitative PCR of both candidate genes.

| <b><i>Pyrosequencing assays</i></b>   |                                      |                                      |                                      |                                                                                                                              |
|---------------------------------------|--------------------------------------|--------------------------------------|--------------------------------------|------------------------------------------------------------------------------------------------------------------------------|
| <b>Assay</b>                          | <b>Forward PCR primer (5' to 3')</b> | <b>Reverse PCR primer (5' to 3')</b> | <b>Sequencing primer (5' to 3')</b>  | <b>Sequence-to-analyze</b>                                                                                                   |
| <i>Dnajb1</i>                         | GATTAGAGTAG<br>AGAGGGAAGG            | TCCCCCAACCCT<br>CCAAAACCTT           | TAGAGAGGGAAG<br>GGG                  | YGTGGTTTYGYGYG                                                                                                               |
| <i>Glcc1l</i> Repeat 1                | GAGGAAGTTAG<br>GTGTAAGTT             | ATACACATTCAAA<br>ACAAATC             | TTATAAGATTTAG<br>TTGTAGTTT           | YGGGYGTTATTTTGGGATTGTTGTTATAT<br>TYGT                                                                                        |
| <i>Glcc1l</i> Repeat 2                | TGGGGAGGGTT<br>ATGTGTT               | ACCCAAACCTCTA<br>ATCACAA             | TGTTTTTTTTGGGA<br>TTGG               | TYGGTTTGTYGATATTTTATTAGTATGTA<br>TTYGATTTGGAGAGGTTGGYGTAAAGTGG<br>TGATTAGYGTAGGYGTAGTAAGGTTGTTT<br>ATA GTTATAGTGTATTGGATATYG |
| <b><i>Quantitative PCR assays</i></b> |                                      |                                      |                                      |                                                                                                                              |
| <b>Assay</b>                          | <b>Forward PCR primer (5' to 3')</b> |                                      | <b>Reverse PCR primer (5' to 3')</b> |                                                                                                                              |
| <i>Dnajb1</i>                         | GCCAGGCCAGCATCACAAGC                 |                                      | AGGAGGCTGGCCCTGTGGTC                 |                                                                                                                              |
| <i>Glcc1l</i>                         | TGTGCAGAGTGGACAGGCCAAAATC            |                                      | GCCACTGTCCTGTGAGGTAAGGT              |                                                                                                                              |
